# Supplementary material
Source: publisher figshare collection journal article supplement (https://tandf.figshare.com/ndownloader/files/14399579)
Supplement: Supplementary file 1 [file 14399579]

**Supporting information**


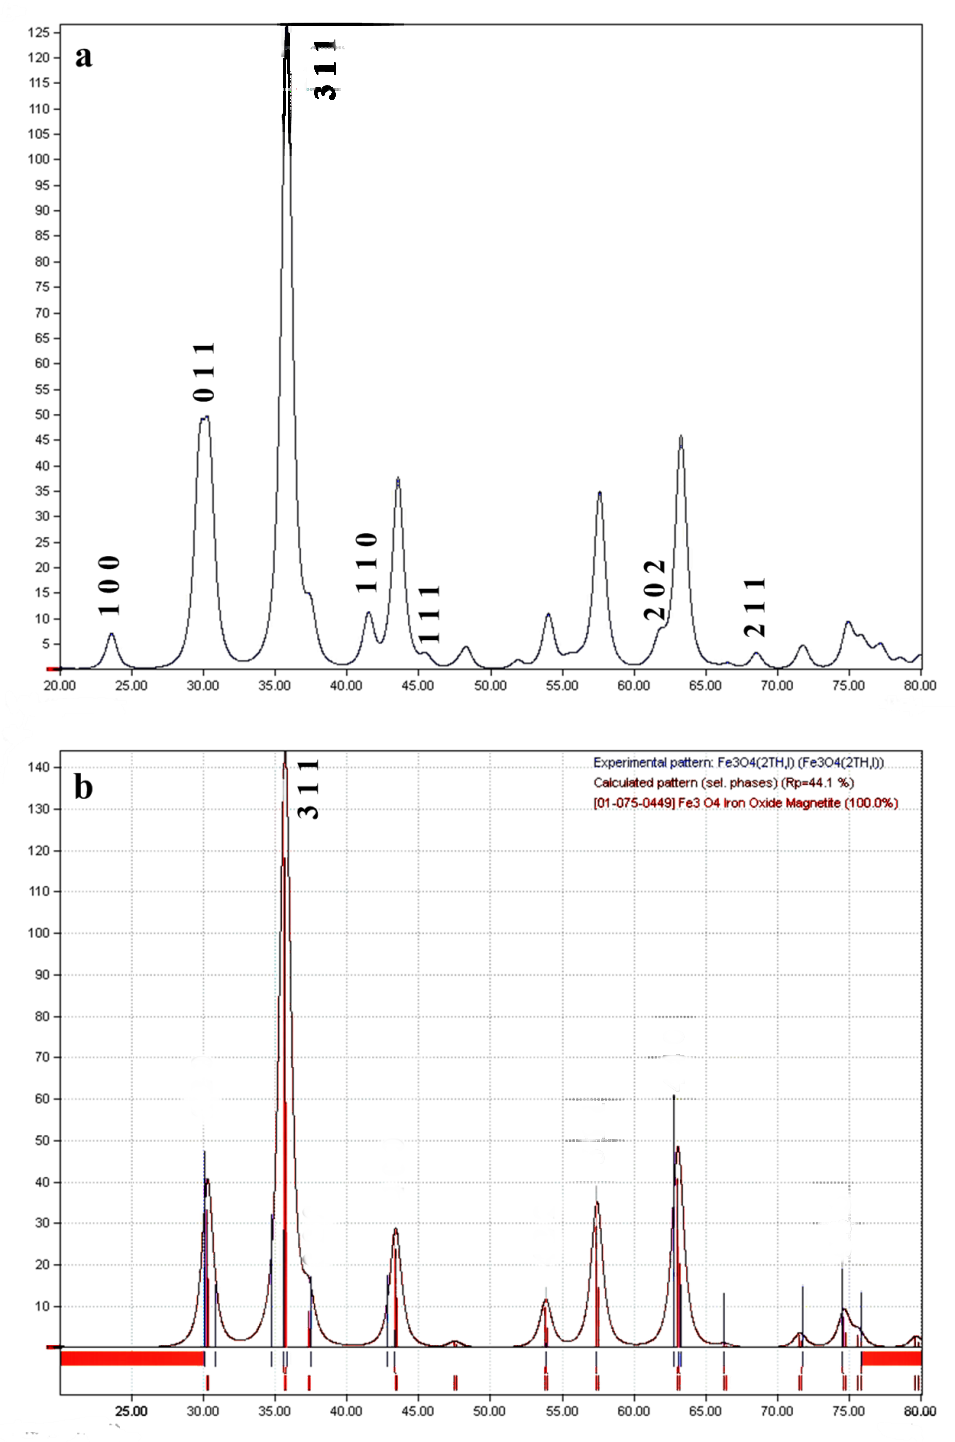


**Figure S1.** XRD patterns of: (a) Fe3O4 nanoparticles and (b) MMSNs together with the characteristic peaks of the standard JCPDS pattern.


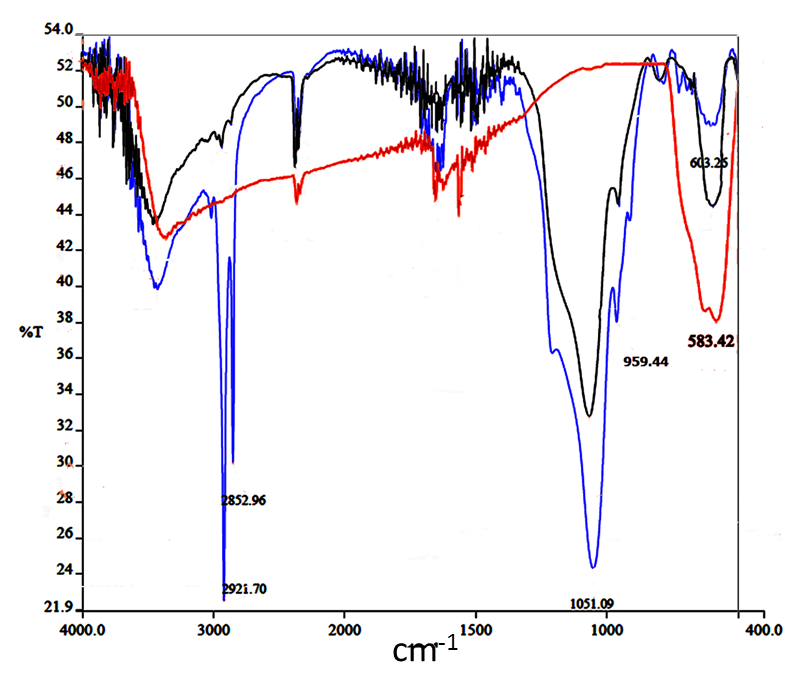


**Figure S2.** FTIR spectra of Fe3O4 (red), MMSNs before surfactant removal (blue), and MMSNs after surfactant removal (black).


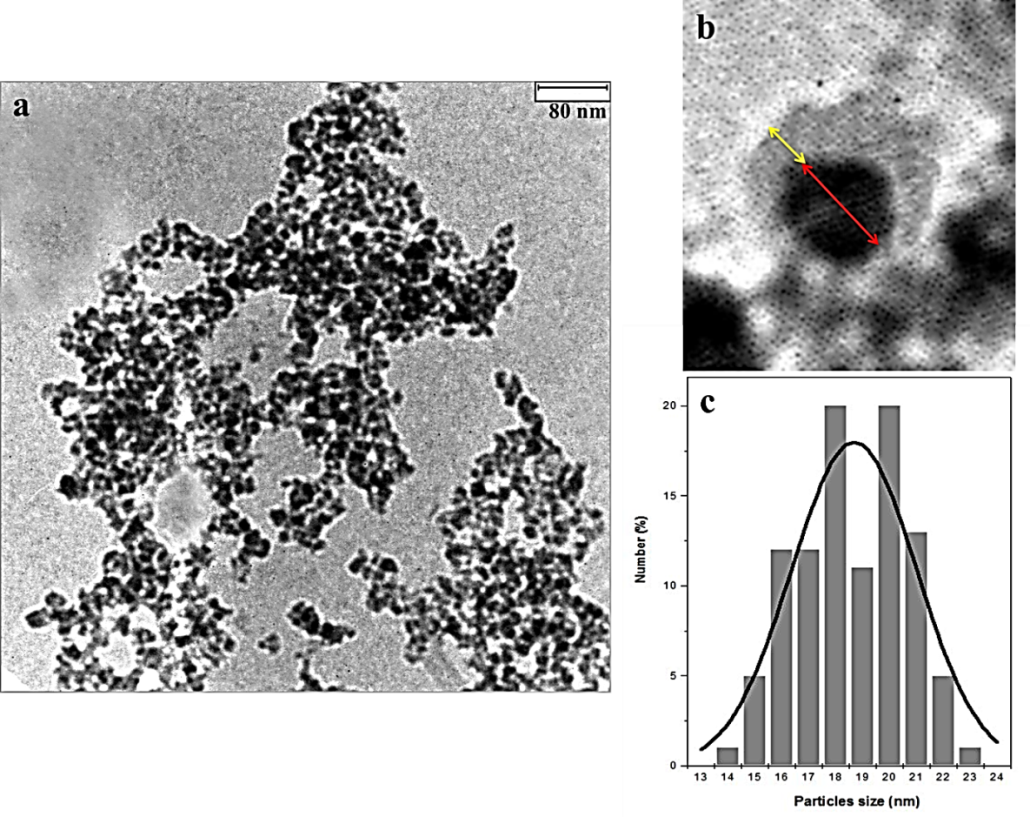


**Figure S3.** TEM images together with size distribution histogram of MMSNs.


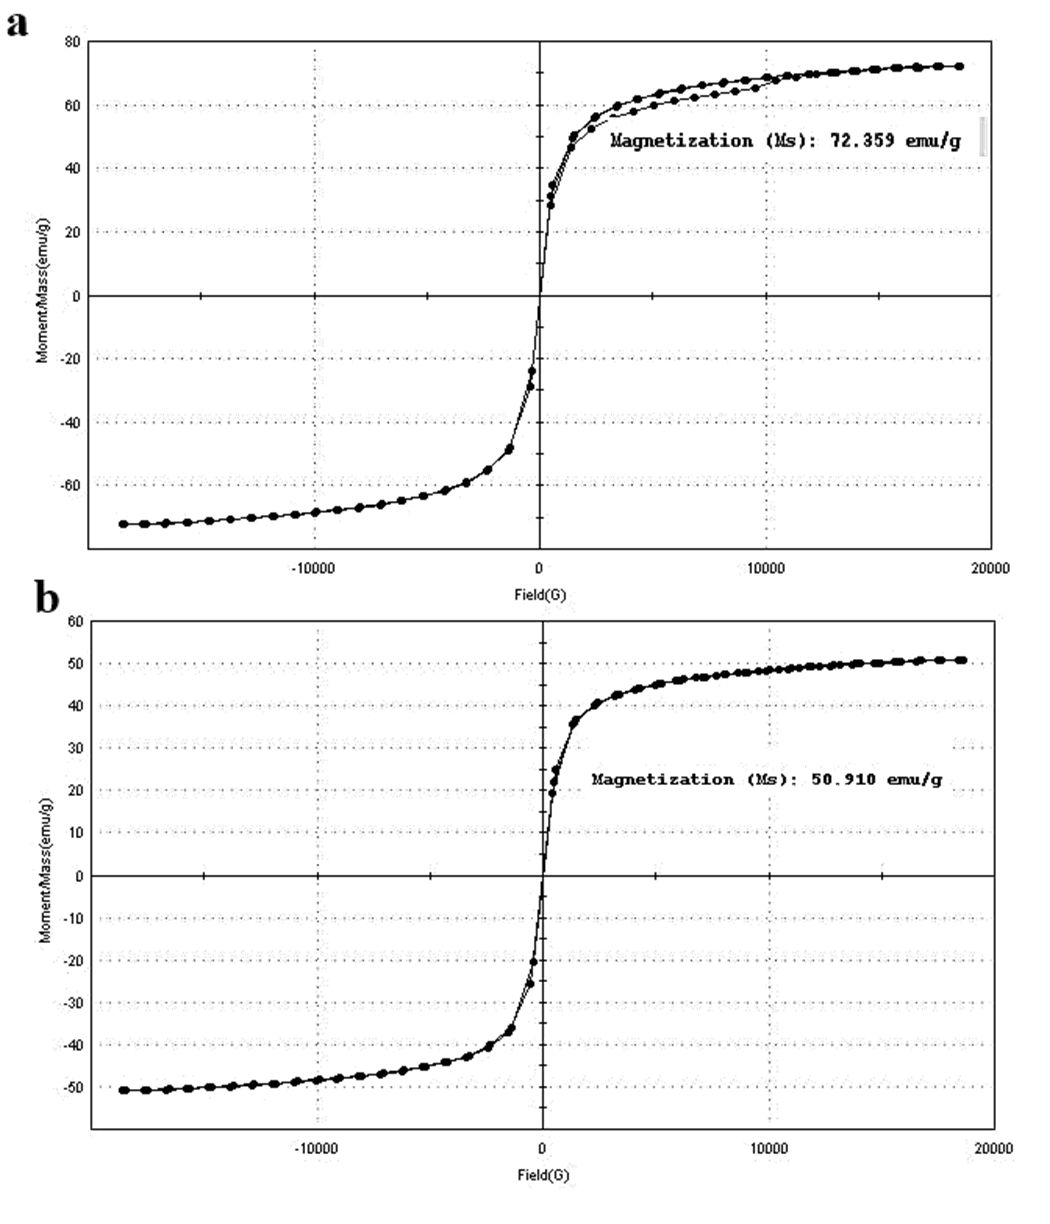


**Figure S4.** Hysteresis loops of the Fe3O4 nanoparticles (a) and MMSNs (b), recorded at a temperature of 300 K.


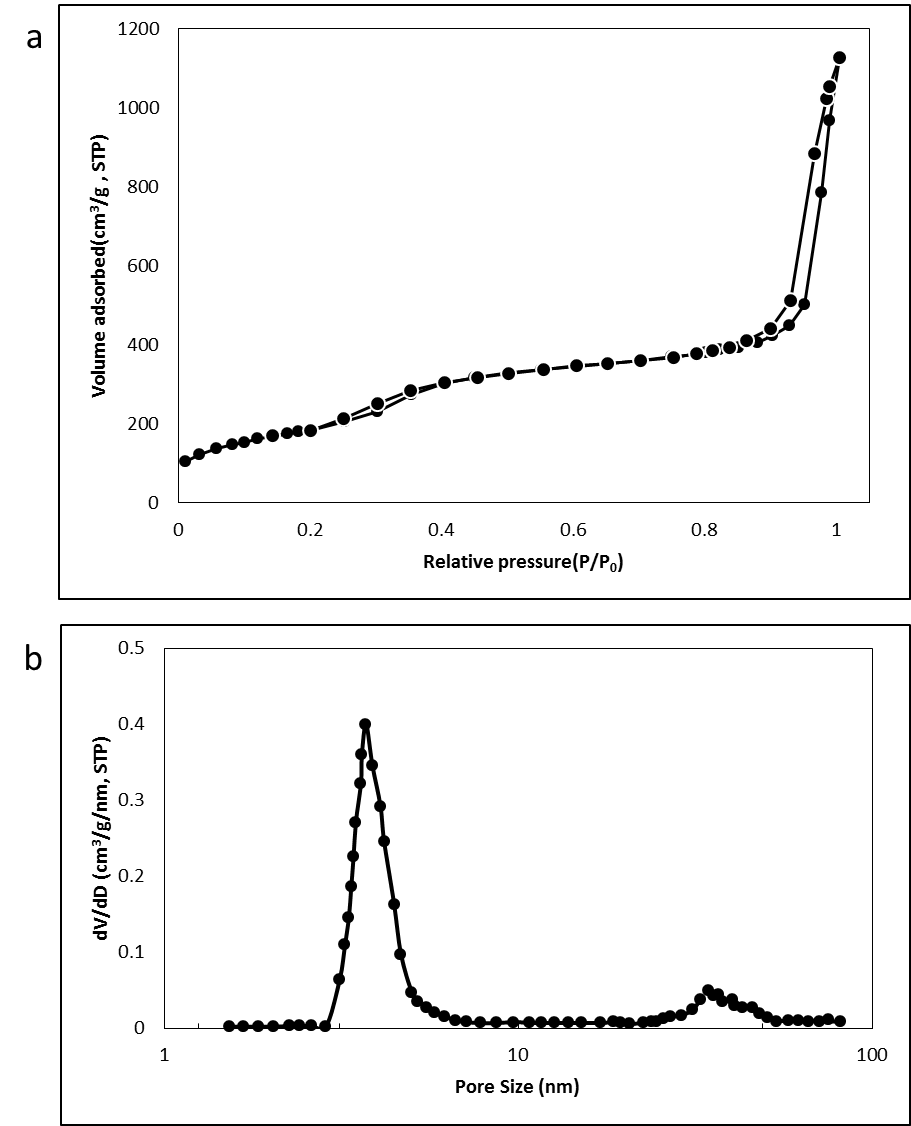


**Figure S5.** (a) N2 adsorption-desorption isotherms and (b) pore size distributions of

MMSNs.

**Figure S6.** Hemolysis assay of MMSNs. Every experimental condition was repeated three times in triplicate. All hemolysis data are presented as mean±SD.
